# Supplementary material for: The anti-inflammatory effects of exercise on autoimmune diseases: A 20-year systematic review
Source: PubMed Central journal article supplement — J Sport Health Sci. 2024 Feb 9;13(3):353–67. doi: 10.1016/j.jshs.2024.02.002 (PMC11117003; doi:10.1016/j.jshs.2024.02.002), 2024-02-09
Supplement: mmc1.pdf [file mmc1.pdf]

# **The anti-inflammatory effects of exercise on autoimmune diseases: A twenty-year systematic review**

Beibei Luo <sup>a,b,†</sup>, Dao Xiang <sup>c,d,†</sup>, Xiaorong Ji <sup>a</sup>, Xuan Chen <sup>a</sup>, Rui Li <sup>a</sup>, Shuxin Zhang <sup>a</sup>, Yujun Meng <sup>a</sup>, David C. Nieman <sup>e,\*</sup>, Peijie Chen <sup>a,f,\*</sup>

a School of Exercise and Health, Shanghai University of Sport, Shanghai 200438, China

b Shanghai Key Laboratory of Human Performance, Shanghai University of Sport, Shanghai 200438, China

c Department of Diving and Hyperbaric Medicine, Naval Medical Center, Shanghai 200433, China

d National Key Laboratory of Immunity and Inflammation, Naval Medical University, Shanghai 200433, China

e Human Performance Laboratory, Appalachian State University, North Carolina Research Campus, Kannapolis, NC 28081, USA

f Research Institute for Doping Control, Shanghai University of Sport, Shanghai 200438, China

† These authors contributed equally to this work.

\* Corresponding authors.

E-mail address: Peijie Chen ([chenpeijie@sus.edu.cn](mailto:chenpeijie@sus.edu.cn)), David C. Nieman ([niemandc@appstate.edu](mailto:niemandc@appstate.edu))

Running title: Anti-inflammatory effects of exercise on autoimmune diseases

## **Supplementary materials**

Supplementary Table 1 Search strategy

Supplementary Table 2 Exercise protocol and safety information of included studies

Supplementary Table 3 Quality assessment of included studies via TESTEX scale

Supplementary Table 4 PRISMA 2020 Checklist

Supplementary Fig. 1 The overall risk of bias for included RCTs

Supplementary Fig. 2 The risk of bias for each included RCT



- 
- (Pemphigus[Title/Abstract]))
- #2 (((((((((((((((((((((((((((((((Physical activity[MeSH Terms]) OR (Exercise[MeSH Terms])) OR (Physical activit\*[Title/Abstract])) OR (Exercis\*[Title/Abstract])) OR (Training\*[Title/Abstract])) OR (Aerobic exercise\*[Title/Abstract])) OR (Anaerobic exercise\*[Title/Abstract])) OR (Cardiorespiratory fitness[Title/Abstract])) OR (Endurance[Title/Abstract])) OR (Isometric exercise\*[Title/Abstract])) OR (Resistance exercise\*[Title/Abstract])) OR (High intensity exercise Interval training[Title/Abstract])) OR (HIIT[Title/Abstract])) OR (Muscle strengthening[Title/Abstract])) OR (Stretching[Title/Abstract])) OR (Chinese traditional exercise[Title/Abstract])) OR (Tai Ji[Title/Abstract])) OR (Taiji[Title/Abstract])) OR (Tai Chi[Title/Abstract])) OR (Taichi[Title/Abstract])) OR (Taijiquan[Title/Abstract])) OR (Taichichuan[Title/Abstract])) OR (Baduanjin[Title/Abstract])) OR (Qigong[Title/Abstract])) OR (Yijinjing[Title/Abstract])) OR (Liuzijue[Title/Abstract])) OR (Wuqinxi[Title/Abstract]))
- #3 (((((((((((((((((((((((((((((((Inflammation[MeSH Terms]) OR (Inflammation[All Fields])) OR (inflammatory[All Fields])) OR (IFN[All Fields])) OR (Interferons[All Fields])) OR (Interferon[All Fields])) OR (TNF[All Fields])) OR (Tumor necrosis factor[All Fields])) OR (IL[All Fields])) OR (Interleukin[All Fields])) OR (TGF[All Fields])) OR (CRP[All Fields])) OR (C-reactive protein[All Fields])) OR (Cytokines[All Fields])) OR (Cytokine[All Fields])) OR (Chemokines[All Fields])) OR (Chemokine[All Fields])) OR (Lymphocyte[All Fields]))
- #4 #1 AND #2 AND #3
- 

There were 3331 records identified through PubMed database searching



TS=(TNF)) OR TS=(Tumor necrosis factor)) OR TS=(IL)) OR TS=(Interleukin)) OR TS=(TGF)) OR TS=(CRP)) OR  
TS=(C-reactive protein)) OR TS=(Cytokines)) OR TS=(Cytokine)) OR TS=(Chemokines)) OR TS=(Chemokine)) OR  
TS=(Lymphocyte)

#4 #1 AND #2 AND #3

---

There were 5848 records identified through Web of Science database searching.

Search strategy in Embase.

| Search | Query                                                                                                                                                                                                                                                                                                                                                                                                                                                                                                                                                                                                                                                                                                                                                                                                                                                                                                                                                                                                                                                                                                                                                                                                                                                                                                                                                                                                                      |
|--------|----------------------------------------------------------------------------------------------------------------------------------------------------------------------------------------------------------------------------------------------------------------------------------------------------------------------------------------------------------------------------------------------------------------------------------------------------------------------------------------------------------------------------------------------------------------------------------------------------------------------------------------------------------------------------------------------------------------------------------------------------------------------------------------------------------------------------------------------------------------------------------------------------------------------------------------------------------------------------------------------------------------------------------------------------------------------------------------------------------------------------------------------------------------------------------------------------------------------------------------------------------------------------------------------------------------------------------------------------------------------------------------------------------------------------|
| #1     | ('autoimmune diseases'/exp OR 'autoimmune diseases':ab,ti,kw OR 'rheumatoid arthritis':ab,ti,kw OR 'polymyositis':ab,ti,kw OR 'dermatomyositis':ab,ti,kw OR 'idiopathic inflammatory myopathies':ab,ti,kw OR 'juvenile idiopathic arthritis':ab,ti,kw OR 'juvenile chronic arthritis':ab,ti,kw OR 'ankylosing spondylitis':ab,ti,kw OR 'axial spondyloarthritis':ab,ti,kw OR 'spondyloarthritis':ab,ti,kw OR 'systemic lupus erythematosus':ab,ti,kw OR 'lupus erythematosus disseminatus':ab,ti,kw OR 'primary sjögren syndrome':ab,ti,kw OR 'sjogrens syndrome':ab,ti,kw OR 'sjogren':ab,ti,kw OR 'sjögren':ab,ti,kw OR 'systemic sclerosis':ab,ti,kw OR 'scleroderma':ab,ti,kw OR 'systemic scleroderma':ab,ti,kw OR 'psoriasis':ab,ti,kw OR 'psoriatic arthritis':ab,ti,kw OR 'type 1 diabetes':ab,ti,kw OR 'autoimmune diabetes':ab,ti,kw OR 'hashimoto disease':ab,ti,kw OR 'thyroiditis':ab,ti,kw OR 'chronic lymphocytic thyroiditis':ab,ti,kw OR 'graves':ab,ti,kw OR 'hashimoto thyroiditis':ab,ti,kw OR 'autoimmune thyroid':ab,ti,kw OR 'inflammatory bowel diseases':ab,ti,kw OR 'inflammatory bowel disease':ab,ti,kw OR 'crohn disease':ab,ti,kw OR 'guillain barre syndrome':ab,ti,kw OR 'guillain-barre syndrome':ab,ti,kw OR 'myasthenia gravis':ab,ti,kw OR 'myasthenia gravis':ab,ti,kw OR 'disseminated sclerosis':ab,ti,kw OR 'arteritis':ab,ti,kw OR 'pemphigoid':ab,ti,kw OR 'pemphigus':ab,ti,kw) |
| #2     | ('exercise'/exp OR 'physical activity'/exp OR 'aerobic exercise':ab,ti,kw OR 'anaerobic exercise':ab,ti,kw OR 'cardiorespiratory fitness':ab,ti,kw OR 'endurance':ab,ti,kw OR 'isometric exercise':ab,ti,kw OR 'resistance exercise':ab,ti,kw OR 'high intensity exercise interval training':ab,ti,kw OR 'muscle strengthening':ab,ti,kw OR 'stretching':ab,ti,kw OR 'chinese traditional exercise':ab,ti,kw OR 'tai ji':ab,ti,kw OR 'taichi':ab,ti,kw OR 'taijiquan':ab,ti,kw OR 'taichichuan':ab,ti,kw OR 'baduanjin':ab,ti,kw OR 'qigong':ab,ti,kw OR 'yijinjing':ab,ti,kw OR 'liuzijue':ab,ti,kw OR 'wuqinxi':ab,ti,kw)                                                                                                                                                                                                                                                                                                                                                                                                                                                                                                                                                                                                                                                                                                                                                                                                |
| #3     | ('inflammation'/exp OR 'inflammatory' OR 'interferons' OR 'interferon' OR 'tumor necrosis factor' OR 'interleukin' OR 'c-reactive protein' OR 'cytokines' OR 'cytokine' OR 'chemokines' OR 'chemokine' OR 'lymphocyte')                                                                                                                                                                                                                                                                                                                                                                                                                                                                                                                                                                                                                                                                                                                                                                                                                                                                                                                                                                                                                                                                                                                                                                                                    |
| #4     | #1 AND #2 AND #3                                                                                                                                                                                                                                                                                                                                                                                                                                                                                                                                                                                                                                                                                                                                                                                                                                                                                                                                                                                                                                                                                                                                                                                                                                                                                                                                                                                                           |

There were 5386 records identified through EMBASE database searching

**Supplementary Table 2.** Exercise protocol and safety information of included studies

| Study                                       | Autoimmune disease | Exercise protocol  |                                      |                 | Safety<br>(dropout, adverse events) |                                                                                                                                                        |
|---------------------------------------------|--------------------|--------------------|--------------------------------------|-----------------|-------------------------------------|--------------------------------------------------------------------------------------------------------------------------------------------------------|
|                                             |                    | Type               | Intensity                            | Frequency       |                                     |                                                                                                                                                        |
| Alvarenga-Filho et al. (2016) <sup>16</sup> | MS                 | Combined RT and AT | RT: $\geq 35\%$<br>1RM<br>AT: 60%    | 2 times/week    | 60 min/session, 12 weeks            | 2 dropouts in Ex                                                                                                                                       |
| Bahmani et al. (2022) <sup>17</sup>         | MS                 | AT                 | $VO_{2max}$<br>50%-70%<br>$HR_{max}$ | 3 times/week    | 20-40 min/session, 8 weeks          | 1 dropout in Ex                                                                                                                                        |
| Bansi et al. (2013) <sup>18</sup>           | MS                 | AT                 | 60% $VO_{2max}$                      | 5 times/week    | 30 min/session, 3 weeks             | 2 dropouts in Ex                                                                                                                                       |
| Barry et al. (2019) <sup>19</sup>           | MS                 | AT                 | 65%-75%<br>$HR_{max}$                | 2 times/week    | 30 min/session, 8 weeks             | N/A                                                                                                                                                    |
| Berkowitz et al. (2019) <sup>20</sup>       | MS                 | AT                 | 50% $VO_{2peak}$                     | N/A             | 20 min, N/A                         | 1 dropout in Ex (illness)                                                                                                                              |
|                                             |                    | AT                 | 80% $VO_{2peak}$                     | N/A             | 20 min, N/A                         |                                                                                                                                                        |
| Briken et al. (2016) <sup>21</sup>          | MS                 | AT                 | 8-12.5W/min                          | N/A             | 20 min, N/A                         | 4 dropouts in Ex (mobility difficulties, fatigue, injury unrelated to the study);<br>1 dropout in Con (mobility difficulties)                          |
|                                             |                    |                    | Personalized                         | 2-3 times/week  | NA, 9 weeks                         |                                                                                                                                                        |
| Castellano et al. (2008) <sup>22</sup>      | MS                 | AT                 | 60% $VO_{2peak}$                     | N/A             | 30 min, N/A                         | No dropout                                                                                                                                             |
|                                             |                    |                    |                                      | 3 times/week    | 30 min/session, 8 weeks             |                                                                                                                                                        |
| Deckx et al. (2016) <sup>23</sup>           | MS                 | Combined RT and AT | Personalized                         | 5 times/2 weeks | 30 min/session, 12 weeks            | 5 dropouts in Ex (mental problems, relapse, corticosteroid treatment);<br>6 dropouts in Con (health problems, relapse, quit, corticosteroid treatment) |



| Study                                   | Autoimmune disease | Exercise protocol                                 |                                                        |                     |                                            | Safety (dropout, adverse events)                                                |
|-----------------------------------------|--------------------|---------------------------------------------------|--------------------------------------------------------|---------------------|--------------------------------------------|---------------------------------------------------------------------------------|
|                                         |                    | Type                                              | Intensity                                              | Frequency           | Duration                                   |                                                                                 |
| Devasahayam et al. (2021) <sup>24</sup> | MS                 | AT                                                | N/A                                                    | N/A                 | N/A                                        | N/A                                                                             |
| Faramarzi et al. (2020) <sup>25</sup>   | MS                 | Combined RT, AT, stretching, balance, and Pilates | RT: 40%-70%<br>1RM<br>AT: 50%-70%<br>HR <sub>max</sub> | 3 times/week        | 100 min/session, 12 weeks                  | 2 dropouts in Ex (unwillingness);<br>4 dropouts in Con (unwillingness, relapse) |
| Golzari et al. (2010) <sup>26</sup>     | MS                 | Combined RT, AT, and stretching                   | N/A                                                    | 24 times/<br>8weeks | 40-50 min/session, 8 weeks                 | No dropout                                                                      |
| Joisten et al. (2021) <sup>27</sup>     | MS                 | HIIT                                              | 95%-100%<br>HR <sub>max</sub>                          | N/A<br>3 times/week | 15.5 min, N/A<br>15.5 min/session, 3 weeks | N/A                                                                             |
|                                         |                    | AT                                                | 65% HR <sub>max</sub>                                  | N/A<br>3 times/week | 24 min, N/A<br>24 min/session, 3 weeks     |                                                                                 |
| Kierkegaard et al. (2016) <sup>28</sup> | MS                 | RT                                                | 80% 1RM                                                | 2 times/week        | 60 min/session, 12 weeks                   | 3 dropouts in Ex (trigeminal neuralgia, headache, personal reasons)             |
| Kjølhede et al. (2016) <sup>29</sup>    | MS                 | RT                                                | 10RM                                                   | N/A                 | 30 min, N/A                                | 1 dropout in Ex (temporary pain reactions)                                      |
|                                         |                    |                                                   | 15RM-6RM                                               | 2 times/week        | 30 min/session, 24 weeks                   |                                                                                 |
| Mähler et al. (2018) <sup>30</sup>      | MS                 | AT                                                | 65% HR <sub>max</sub>                                  | 3 times/week        | 60 min/session, 4 weeks                    | 1 dropout in Ex                                                                 |
| Majdinasab et al. (2018) <sup>31</sup>  | MS                 | AT                                                | 60%-70%HR <sub>m</sub><br>ax                           | N/A                 | 30 min, N/A                                | No dropout                                                                      |

| Study                                     | Autoimmune disease | Exercise protocol       |                                     |              | Safety<br>(dropout, adverse events) |                                                                                                                                            |
|-------------------------------------------|--------------------|-------------------------|-------------------------------------|--------------|-------------------------------------|--------------------------------------------------------------------------------------------------------------------------------------------|
|                                           |                    | Type                    | Intensity                           | Frequency    |                                     | Duration                                                                                                                                   |
| Mokhtarzade et al. (2017) <sup>32</sup>   | MS                 | AT                      | 60%-75%<br>$W_{max}$<br>AT: 50%-75% | 3 times/week | 42-66 min/session, 8 weeks          | 3 dropouts in Ex (relapse, unwillingness);<br>2 dropouts in Con (unwillingness)<br>4 dropouts in Ex (unwillingness, migration, pregnancy); |
| Mokhtarzade et al. (2021) <sup>33</sup>   | MS                 | Combined RT and AT      | HRR<br>RT: RPE 5-8                  | 5 times/week | N/A, 24 weeks                       | 3 dropouts in Con (relapse, unwillingness)                                                                                                 |
| Nieste et al. (2022) <sup>34</sup>        | MS                 | AT                      | 50%-60%<br>$W_{max}$                | 1 time/day   | 20-30 min/session, 4 days           | 1 dropout in Con                                                                                                                           |
| Ozkul et al. (2018) <sup>35</sup>         | MS                 | Combined AT and Pilates | 60%-80%<br>$HR_{max}$               | 3 times/week | 80 min/session, 8 weeks             | 3 dropouts in Ex (relapse, work intensity);<br>2 dropouts in Con (personal reasons)                                                        |
| Schulz et al. (2004) <sup>36</sup>        | MS                 | AT                      | 75% $W_{max}$<br>AT: 40%-70%        | 2 times/week | 30 min/session, 8 weeks             | N/A                                                                                                                                        |
| Tadayon Zadeh et al. (2020) <sup>37</sup> | MS                 | Combined AT and RT      | $HR_{max}$<br>RT:<br>Personalized   | 3 times/week | >30min/session, 8 weeks             | No dropout                                                                                                                                 |
| White et al. (2006) <sup>38</sup>         | MS                 | RT                      | 40-70 MVC<br>AT: 65%-80%            | 2 times/week | 30min/session, 8 weeks              | N/A                                                                                                                                        |
| Acar et al. (2016) <sup>39</sup>          | RA                 | Combined RT and AT      | $HR_{max}$<br>RT:<br>Personalized   | 3 times/week | 60 min, 8 weeks                     | N/A                                                                                                                                        |
| Andersson et al. (2020) <sup>40</sup>     | RA                 | Combined RT and AT      | AT: 70%-89%<br>$HR_{max}$           | 3 times/week | 40 min, 20 weeks                    | 1 dropout in Con                                                                                                                           |

| Study                                           | Autoimmune disease | Exercise protocol        |                                                        |                     |                                        | Safety (dropout, adverse events)                                                                          |
|-------------------------------------------------|--------------------|--------------------------|--------------------------------------------------------|---------------------|----------------------------------------|-----------------------------------------------------------------------------------------------------------|
|                                                 |                    | Type                     | Intensity                                              | Frequency           | Duration                               |                                                                                                           |
| Azeez et al. (2020) <sup>41</sup>               | RA                 | Combined RT and AT       | RT: 70%-80%<br>1RM<br>N/A                              | 7 times/week        | N/A, 12 weeks                          | 4 dropouts in Ex; 3 dropouts in Con (didn't return for assessment)                                        |
| Bartlett et al. (2018) <sup>42</sup>            | RA                 | HIIT                     | 50%-90%<br>VO <sub>2</sub> reserve                     | 3 times/week        | 30 min/session, 10 weeks               | No dropout                                                                                                |
| Ercan et al. 2023) <sup>43</sup>                | RA                 | AT                       | 60%-80%<br>HR <sub>max</sub>                           | N/A                 | 30 min, N/A                            | 2 dropouts in Ex                                                                                          |
| Gautam et al. (2019) <sup>44</sup>              | RA                 | Yoga                     | N/A                                                    | 5 times/week        | 120 min/session, 8 weeks               | 6 dropouts in Ex (injury, work conflict); 4 dropouts in Con (travelling, work conflict, personal reasons) |
| Gautam et al. (2020) <sup>45</sup>              | RA                 | Yoga                     | N/A                                                    | 5 times/week        | 120 min/session, 8 weeks               | 2 dropouts in Ex (job transfer); 2 dropouts in Con (domestic reason)                                      |
| Joo et al. (2022) <sup>46</sup>                 | RA                 | RT                       | N/A                                                    | 3 times/week        | 60 min/session, 12 weeks               | 4 dropouts in Ex (cancer, relapse, declined to participate); 1 dropout in Con (declined to participate)   |
| Law et al. (2015) <sup>47</sup>                 | RA                 | AT<br>Combined RT and AT | AT: 66±9 %<br>HR <sub>max</sub><br>RT: 80% 1RM         | N/A<br>3 times/week | 30 min, N/A<br>60 min/session, 8 weeks | No dropout                                                                                                |
| Lozada-Mellado et al. (2022) <sup>48</sup>      | RA                 | Combined RT and AT       | AT: 55%-75%<br>HR <sub>max</sub><br>RT: 50%-65%<br>1RM | 2 times/week        | >30 min/session, 24 weeks              | 3 dropouts in Ex (work issues); 9 dropouts in Con (work issues, unknown)                                  |
| Pereira Nunes Pinto et al. (2017) <sup>49</sup> | RA                 | RT                       | 50% and 75%<br>1RM                                     | N/A                 | 25 min, N/A                            | No dropout                                                                                                |

| Study                                                | Autoimmune disease | Exercise protocol                  |                                                      |              | Safety<br>(dropout, adverse events) |                                                                               |
|------------------------------------------------------|--------------------|------------------------------------|------------------------------------------------------|--------------|-------------------------------------|-------------------------------------------------------------------------------|
|                                                      |                    | Type                               | Intensity                                            | Frequency    |                                     | Duration                                                                      |
| Sarajlic et al. (2018) <sup>50</sup>                 | RA                 | Combined RT and AT                 | AT:60%-85%<br>HR <sub>max</sub><br>RT:50%-80%<br>1RM | 2 times/week | 45 min/session, 2 years             | N/A                                                                           |
| Stavropoulos-Kalino glou et al. (2013) <sup>51</sup> | RA                 | Combined RT and AT                 | AT: 70%<br>HR <sub>max</sub><br>RT: 70% 1RM          | 3 times/week | 60-70 min/session, 24 weeks         | 2 dropouts in Ex (ulcer, arrhythmia);<br>2 dropouts in Con (loss of interest) |
| Wadley et al. (2014) <sup>52</sup>                   | RA                 | AT                                 | 70% VO <sub>2max</sub>                               | 3 times/week | 30-40 min/session, 12 weeks         | N/A                                                                           |
| Farinha et al. (2018) <sup>53</sup>                  | T1D                | HIIT<br>RT<br>Combined HIIT and RT | HIIT:50%-90%<br>% HR <sub>max</sub><br>RT: 8RM       | 3 times/week | >25 min/session, 10 weeks           | No dropout                                                                    |
| Galassetti et al. (2006) <sup>54</sup>               | T1D                | AT                                 | 80% VO <sub>2max</sub>                               | N/A          | 30 min, N/A                         | No dropout                                                                    |
| Galassetti et al. (2006) <sup>55</sup>               | T1D                | AT                                 | 80% VO <sub>2max</sub>                               | N/A          | 30 min, N/A                         | No dropout                                                                    |
| Minnock et al. (2020) <sup>56</sup>                  | T1D                | Combined AT and RT                 | AT: 80% HRR<br>RT: 80% 1RM                           | N/A          | 60 min, N/A                         | N/A                                                                           |
| Minnock et al. (2022) <sup>57</sup>                  | T1D                | Combined AT and RT                 | AT: 80% HRR<br>RT: 80% 1RM                           | 3 times/week | 40 min/session, 12 weeks            | No dropout                                                                    |
| Nazari et al. (2023) <sup>58</sup>                   | T1D                | Combined AT and RT                 | AT:50%-75%<br>HR <sub>max</sub>                      | 3 times/week | 60 min/session, 16 weeks            | 2 dropouts in Ex (domestic reason);                                           |

| Study                                      | Autoimmune disease | Exercise protocol  |                                          |                     |                                            | Safety<br>(dropout, adverse events)           |
|--------------------------------------------|--------------------|--------------------|------------------------------------------|---------------------|--------------------------------------------|-----------------------------------------------|
|                                            |                    | Type               | Intensity                                | Frequency           | Duration                                   |                                               |
|                                            |                    |                    | RT: N/A                                  |                     |                                            | 2 dropouts in Con (unwillingness to continue) |
| Rosa et al. (2008) <sup>59</sup>           | T1D                | AT                 | <80% $VO_{2max}$                         | N/A                 | 30 min, N/A                                | N/A                                           |
| Rosa et al. (2010) <sup>60</sup>           | T1D                | AT                 | <80% $VO_{2max}$                         | N/A                 | 30 min, N/A                                | N/A                                           |
| Rosa et al. (2011) <sup>61</sup>           | T1D                | AT                 | <80% $VO_{2max}$                         | N/A                 | 30 min, N/A                                | N/A                                           |
| Rosa et al. (2011) <sup>62</sup>           | T1D                | AT                 | <80% $VO_{2max}$                         | N/A                 | 30 min, N/A                                | N/A                                           |
| Salman et al. (2008) <sup>63</sup>         | T1D                | AT                 | N/A                                      | N/A                 | N/A                                        | N/A                                           |
| Turner et al. (2014) <sup>64</sup>         | T1D                | RT                 | 67±3% 1RM                                | 1 time/day          | 15-45 min/session, 4 days                  | N/A                                           |
| Żebrowska et al. (2018) <sup>65</sup>      | T1D                | AT<br>HIIT         | 50% LT<br>120% LT                        | N/A                 | 40 min, N/A                                | N/A                                           |
| Clarke-Jenssen et al. (2005) <sup>66</sup> | SLE                | AT                 | 70% $HR_{max}$                           | 3 times/week        | 25-40 min/session, 12 weeks                | No dropout                                    |
| da Silva et al. (2013) <sup>67</sup>       | SLE                | AT                 | N/A                                      | N/A                 | N/A                                        | N/A                                           |
| Hashemi et al. (2022) <sup>68</sup>        | SLE                | Combined AT and RT | AT: 50%-60% $VO_{2peak}$                 | 3 times/week        | 80 min/session, 8 weeks                    | 5 dropouts in Ex;<br>1 dropout in Con         |
| Perandini et al. (2014) <sup>69</sup>      | SLE                | AT                 | 60% $VO_{2peak}$<br>40%-60% $VO_{2peak}$ | N/A<br>2 times/week | 45 min, N/A<br>30-50 min/session, 12 weeks | No dropout                                    |
| Perandini et al. (2015) <sup>70</sup>      | SLE                | AT                 | 40%-60% $VO_{2peak}$                     | N/A                 | 30min, N/A                                 | N/A                                           |

| Study                                         | Autoimmune disease | Exercise protocol                                                                            |                                    |              | Safety<br>(dropout, adverse events) |                                                                                                  |
|-----------------------------------------------|--------------------|----------------------------------------------------------------------------------------------|------------------------------------|--------------|-------------------------------------|--------------------------------------------------------------------------------------------------|
|                                               |                    | Type                                                                                         | Intensity                          | Frequency    |                                     | Duration                                                                                         |
| Perandini et al. (2016) <sup>71</sup>         | SLE                | AT                                                                                           | 60%-75%<br>VO <sub>2peak</sub>     | N/A          | 30 min, N/A                         | N/A                                                                                              |
| Soriano-Maldonado et al. (2018) <sup>72</sup> | SLE                | AT                                                                                           | 35%-75%<br>HRR                     | 2 times/week | 55-90 min/session, 12 weeks         | 4 dropouts in Ex (lack of time, sciatica);<br>4 dropouts in Con (lack of time)                   |
| Timóteo et al. (2018) <sup>73</sup>           | SLE                | Combined<br>RT, AT, and<br>stretching                                                        | AT:<br>Personalized<br>RT: 70% 1RM | 3 times/week | 50 min/session, 16 weeks            | No dropout                                                                                       |
| Aydın et al. (2016) <sup>74</sup>             | AS                 | Calisthenic<br>exercise<br>Combined<br>RT, postural<br>correction<br>and<br>stretching       | N/A                                | 5 times/week | 60 min/session, 8 weeks             | 3 dropouts in Ex<br>(failure to adapt to the exercise)                                           |
| Hulejová et al. (2012) <sup>76</sup>          | AS                 | Combined<br>dance and<br>Pilates<br>Combined<br>core spinal<br>traction and<br>strengthening | N/A                                | 2 times/week | 45 min/session, 12 weeks            | 4 dropouts in Ex                                                                                 |
| Kisacik et al. (2016) <sup>77</sup>           | AS                 | Combined<br>core spinal<br>traction and<br>strengthening                                     | N/A                                | 3 times/week | 60 min/session, 12 weeks            | 16 dropouts in Ex<br>(pregnant, traffic accident, illness,<br>transportation problems, divorced) |
| Levitova et al. (2016) <sup>78</sup>          | AS                 | Tai Chi                                                                                      | N/A                                | 2 times/week | 60 min/session, 24 weeks            | 6 dropouts in Ex<br>(illness, peripheral arthritis)                                              |
| Ma et al. (2020) <sup>79</sup>                | AS                 | Tai Chi                                                                                      | N/A                                | 3 times/week | 30-40 min/session, 12 weeks         | No dropout                                                                                       |

| Study                                       | Autoimmune disease | Exercise protocol                    |                                                  |              | Safety<br>(dropout, adverse events) |                                                                                                                              |
|---------------------------------------------|--------------------|--------------------------------------|--------------------------------------------------|--------------|-------------------------------------|------------------------------------------------------------------------------------------------------------------------------|
|                                             |                    | Type                                 | Intensity                                        | Frequency    |                                     | Duration                                                                                                                     |
| Nolte et al. (2021) <sup>80</sup>           | AS                 | Combined<br>AT, RT and<br>stretching | N/A                                              | 3 times/week | N/A, 24 weeks                       | 4 dropouts in Ex (time constraints,<br>travelling, work commitments);<br>5 dropouts in Con (time constraints,<br>travelling) |
| de Souza et al.<br>(2017) <sup>75</sup>     | AS                 | RT                                   | 50%-70%<br>1RM                                   | 2 times/week | 50 min/session, 16 weeks            | 3 dropouts in Ex (rupture of calcaneus<br>tendon and pain);<br>2 dropouts in Con (loss of contact of<br>calcaneus tendon)    |
| Sveaas et al.<br>(2020) <sup>81</sup>       | AS                 | Combined<br>HIIT and RT              | RT: 8-10 RM<br>HIIT: 70-95%<br>HR <sub>max</sub> | 3 times/week | 40-60 min/session, 12<br>weeks      | 2 dropouts in Ex (chest pain, nausea,<br>persistent pain during exercise);<br>1 dropout in Con                               |
| Alexanderson et al.<br>(2007) <sup>82</sup> | IIM                | RT                                   | 10 RM                                            | 3 times/week | 45 min/session, 7 weeks             | 1 dropout in Ex<br>(influenza-like symptoms)                                                                                 |
| Alexanderson et al.<br>(2014) <sup>83</sup> | IIM                | RT                                   | N/A                                              | 5 times/week | >20 min/session, 24<br>weeks        | 2 dropouts in Ex<br>(ovarian cancer, alveolitis)                                                                             |
| Arnardottir et al.<br>(2003) <sup>84</sup>  | IIM                | Combined<br>AT and RT                | N/A                                              | 5 times/week | 30 min/session, 12 weeks            | N/A                                                                                                                          |
| Coudert et al.<br>(2022) <sup>85</sup>      | IIM                | Combined<br>AT and RT                | N/A                                              | 3 times/week | 30-60 min/session, 26<br>weeks      | N/A                                                                                                                          |
| Švec et al. (2022) <sup>86</sup>            | IIM                | RT and<br>stability<br>training      | N/A                                              | 2 times/week | 60 min/session, 24 weeks            | No dropout                                                                                                                   |
| Bjelica et al.<br>(2023) <sup>87</sup>      | IBD                | Combined<br>AT and RT                | N/A                                              | 3 times/week | 30-60 min/session, 16<br>weeks      | 1 dropout in Ex                                                                                                              |

| Study                                     | Autoimmune disease | Exercise protocol          |                           |              |                             | Safety<br>(dropout, adverse events)                                                                                    |
|-------------------------------------------|--------------------|----------------------------|---------------------------|--------------|-----------------------------|------------------------------------------------------------------------------------------------------------------------|
|                                           |                    | Type                       | Intensity                 | Frequency    | Duration                    |                                                                                                                        |
| Cronin et al. et al. (2019) <sup>88</sup> | IBD                | Combined AT and RT         | AT: RPE 5-7               | 3 times/week | >20 min/session, 8 week     | 2 dropouts in Ex (personal reasons, time constraints);<br>2 dropouts in Con (pregnant)                                 |
| Klare et al. (2015) <sup>89</sup>         | IBD                | AT                         | Moderate intensity        | 3 times/week | N/A, 10 weeks               | 3 dropouts in Ex (lack of motivation, injury, mild abdominal symptoms);<br>3 dropouts in Con (didn't attend follow-up) |
| Lamers et al. (2021) <sup>90</sup>        | IBD                | AT                         | 60%-70% HR <sub>max</sub> | 1 time/day   | >30 min/session, 4 days     | 2 dropouts in Ex (fall, abdominal pain and frequent loose stools)                                                      |
| Legeret et al. (2019) <sup>91</sup>       | IBD                | Exercise games (dance, AT) | N/A                       | 5 times/week | 30 min/session, 8 weeks     | N/A                                                                                                                    |
| Scheffers et al. (2023) <sup>92</sup>     | IBD                | Combined AT and RT         | N/A                       | 3 times/week | 60 min/session, 12 weeks    | 1 dropout in Ex                                                                                                        |
| Astley et al. (2021) <sup>93</sup>        | TA                 | Combined AT and RT         | N/A                       | 3 times/week | NA, 12 weeks                | 3 dropouts in Con (personal reasons)                                                                                   |
| Li et al. (2020) <sup>94</sup>            | TA                 | RT                         | 60%-80% 1RM               | 2 times/week | 60 min/session, 12 weeks    | 7 dropouts in Ex; 9 dropouts in Con (personal reasons or noncompliance)                                                |
| Oliveira et al. (2017) <sup>95</sup>      | TA                 | AT                         | 60% VO <sub>2peak</sub>   | N/A          | 45 min, N/A                 | N/A                                                                                                                    |
| Rochette et al. (2018) <sup>96</sup>      | JIA                | AT                         | N/A                       | 2 times/week | 30-50 min/session, 12 weeks | N/A                                                                                                                    |
|                                           |                    |                            | 70% HR <sub>max</sub>     | N/A          | 20 min, N/A                 | No dropout                                                                                                             |



| Study                                   | Autoimmune disease | Exercise protocol          |                           |              | Safety<br>(dropout, adverse events) |                                                                                     |
|-----------------------------------------|--------------------|----------------------------|---------------------------|--------------|-------------------------------------|-------------------------------------------------------------------------------------|
|                                         |                    | Type                       | Intensity                 | Frequency    |                                     | Duration                                                                            |
| Rochette et al. (2018) <sup>97</sup>    | JIA                | AT                         | 70% HR <sub>max</sub>     | N/A          | 20 min, N/A                         | No dropout                                                                          |
| Timóteo et al. (2019) <sup>98</sup>     | PF                 | Combined RT and stretching | RT: 70% 1RM               | 3 times/week | 60 min/session, 12 weeks            | N/A                                                                                 |
| Hargadóttir et al. (2010) <sup>99</sup> | SSc                | AT                         | N/A                       | N/A          | 8-12 min, N/A                       | N/A                                                                                 |
| Pool et al. (2004) <sup>100</sup>       | RA and SLE         | AT                         | N/A                       | N/A          | N/A                                 | No dropout                                                                          |
| Sandstad et al. (2015) <sup>101</sup>   | RA and JIA         | HIIT                       | 70%-95% HR <sub>max</sub> | 2 times/week | 35 min/session, 10 weeks            | 3 dropouts in Ex (migration, arthritis);<br>4 dropouts in Con (migration, pregnant) |
| Taspınar et al. (2015) <sup>102</sup>   | AS and MS          | Calisthenic exercise       | N/A                       | 5 times/week | 60 min/session, 8 weeks             | 4 dropouts in Ex                                                                    |

Abbreviations: Ex = exercise group; Con = control group; HRR: heart rate reserve; HR<sub>max</sub> = maximum heart rate; RM = repetition maximum; RPE = rate of perceived exertion; LT = lactate threshold; MVC = maximal voluntary isometric contraction; N/A = not applicable; VO<sub>2max</sub> = maximal oxygen uptake; VO<sub>2peak</sub> = peak oxygen uptake; VO<sub>2reserve</sub> = oxygen uptake reserve; W<sub>max</sub> = maximum watts.

**Supplementary Table 3.** Quality assessment of included studies via TESTEX scale

| Study ( <i>n</i> = 87)                      | Score |   |   |   |   |   |   |   |   |    |    |    | Total |
|---------------------------------------------|-------|---|---|---|---|---|---|---|---|----|----|----|-------|
|                                             | 1     | 2 | 3 | 4 | 5 | 6 | 7 | 8 | 9 | 10 | 11 | 12 |       |
| Acar et al. (2016) <sup>39</sup>            | NRCT  | 1 | 0 | 0 | 0 | 0 | 1 | 0 | 2 | 1  | 1  | 1  | 1     |
| Alexanderson et al. (2007) <sup>82</sup>    | NRCT  | 1 | 0 | 0 | 0 | 0 | 1 | 0 | 0 | 1  | 0  | 1  | 1     |
| Alexanderson et al. (2014) <sup>83</sup>    | RCT   | 1 | 1 | 0 | 1 | 1 | 3 | 1 | 2 | 1  | 1  | 0  | 1     |
| Alvarenga-Filho et al. (2016) <sup>16</sup> | NRCT  | 1 | 0 | 0 | 1 | 0 | 1 | 0 | 2 | 1  | 0  | 1  | 1     |
| Andersson et al. (2020) <sup>40</sup>       | RCT   | 1 | 1 | 1 | 0 | 1 | 1 | 0 | 2 | 1  | 0  | 0  | 1     |
| Arnardottir et al. (2003) <sup>84</sup>     | NRCT  | 1 | 0 | 0 | 0 | 0 | 1 | 0 | 0 | 1  | 0  | 0  | 0     |
| Astley et al. (2021) <sup>93</sup>          | RCT   | 1 | 1 | 0 | 1 | 1 | 2 | 0 | 2 | 1  | 0  | 1  | 0     |
| Aydin et al. (2016) <sup>74</sup>           | RCT   | 1 | 1 | 0 | 1 | 0 | 2 | 0 | 2 | 1  | 0  | 0  | 0     |
| Azeez et al. (2020) <sup>41</sup>           | RCT   | 1 | 1 | 0 | 1 | 0 | 1 | 0 | 2 | 1  | 0  | 1  | 1     |
| Bahmani et al. (2022) <sup>17</sup>         | RCT   | 1 | 1 | 0 | 0 | 0 | 1 | 0 | 2 | 1  | 0  | 1  | 1     |
| Bansi et al. (2013) <sup>18</sup>           | RCT   | 1 | 0 | 0 | 1 | 0 | 1 | 0 | 2 | 1  | 0  | 0  | 1     |
| Barry et al. (2019) <sup>19</sup>           | NRCT  | 1 | 0 | 0 | 0 | 0 | 1 | 0 | 2 | 1  | 0  | 0  | 0     |
| Bartlett et al. (2018) <sup>42</sup>        | NRCT  | 1 | 0 | 0 | 0 | 0 | 1 | 0 | 0 | 1  | 0  | 0  | 0     |
| Berkowitz et al. (2019) <sup>20</sup>       | NRCT  | 1 | 0 | 0 | 0 | 0 | 1 | 0 | 2 | 1  | 0  | 1  | 1     |
| Bjelica et al. (2023) <sup>87</sup>         | NRCT  | 1 | 0 | 0 | 0 | 0 | 3 | 0 | 0 | 1  | 0  | 1  | 1     |
| Briken et al. (2016) <sup>21</sup>          | RCT   | 1 | 1 | 1 | 1 | 0 | 2 | 0 | 2 | 1  | 0  | 1  | 1     |

| Study (n = 87)                             | Score |   |   |   |   |   |   |   |   |    |    |    | Total |   |
|--------------------------------------------|-------|---|---|---|---|---|---|---|---|----|----|----|-------|---|
|                                            | 1     | 2 | 3 | 4 | 5 | 6 | 7 | 8 | 9 | 10 | 11 | 12 |       |   |
| Castellano et al. (2008) <sup>22</sup>     | NRCT  | 1 | 0 | 0 | 0 | 0 | 0 | 0 | 0 | 1  | 1  | 0  | 0     | 1 |
| Clarke-Jenssen et al. (2005) <sup>66</sup> | NRCT  | 1 | 0 | 0 | 0 | 0 | 0 | 1 | 0 | 0  | 1  | 0  | 1     | 1 |
| Coudert et al. (2022) <sup>85</sup>        | RCT   | 1 | 1 | 1 | 0 | 1 | 1 | 0 | 0 | 0  | 1  | 1  | 1     | 1 |
| Cronin et al. et al. (2019) <sup>88</sup>  | RCT   | 1 | 1 | 0 | 1 | 0 | 2 | 0 | 2 | 1  | 1  | 1  | 1     | 1 |
| da Silva et al. (2013) <sup>67</sup>       | NRCT  | 1 | 0 | 0 | 0 | 0 | 0 | 1 | 0 | 2  | 1  | 0  | 0     | 0 |
| de Souza et al. (2017) <sup>75</sup>       | RCT   | 1 | 1 | 1 | 1 | 1 | 1 | 2 | 1 | 2  | 1  | 0  | 0     | 1 |
| Deckx et al. (2016) <sup>23</sup>          | RCT   | 1 | 1 | 0 | 1 | 1 | 1 | 1 | 0 | 2  | 1  | 0  | 0     | 1 |
| Devasahayam et al. (2021) <sup>24</sup>    | NRCT  | 1 | 0 | 0 | 0 | 0 | 0 | 1 | 0 | 2  | 1  | 0  | 1     | 1 |
| Ercan et al. (2023) <sup>43</sup>          | NRCT  | 1 | 0 | 0 | 0 | 0 | 0 | 1 | 0 | 2  | 1  | 0  | 1     | 1 |
| Famarzi et al. (2020) <sup>25</sup>        | RCT   | 1 | 0 | 0 | 0 | 0 | 1 | 3 | 0 | 2  | 1  | 0  | 1     | 1 |
| Farinha et al. (2018) <sup>53</sup>        | RCT   | 1 | 1 | 0 | 1 | 1 | 1 | 2 | 0 | 2  | 1  | 0  | 1     | 1 |
| Galassetti et al. (2006) <sup>54</sup>     | NRCT  | 1 | 0 | 0 | 0 | 0 | 0 | 1 | 0 | 2  | 1  | 0  | 0     | 1 |
| Galassetti et al. (2006) <sup>55</sup>     | NRCT  | 1 | 0 | 0 | 0 | 0 | 0 | 1 | 0 | 2  | 1  | 0  | 0     | 1 |
| Gautam et al. (2019) <sup>44</sup>         | RCT   | 1 | 1 | 1 | 1 | 1 | 1 | 1 | 1 | 2  | 1  | 0  | 0     | 0 |
| Gautam et al. (2020) <sup>45</sup>         | RCT   | 1 | 1 | 1 | 1 | 1 | 1 | 1 | 1 | 2  | 1  | 0  | 0     | 0 |
| Golzari et al. (2010) <sup>26</sup>        | RCT   | 1 | 0 | 0 | 0 | 0 | 0 | 1 | 0 | 0  | 0  | 1  | 1     | 1 |
| Hargardóttir et al. (2010) <sup>99</sup>   | NRCT  | 1 | 0 | 0 | 0 | 0 | 0 | 1 | 0 | 2  | 1  | 0  | 0     | 1 |
| Hashemi et al. (2022) <sup>68</sup>        | RCT   | 1 | 0 | 0 | 0 | 1 | 0 | 0 | 0 | 2  | 1  | 0  | 0     | 1 |

| Study (n = 87)                             | Score |   |   |   |   |   |   |   |   |    |    |    | Total |
|--------------------------------------------|-------|---|---|---|---|---|---|---|---|----|----|----|-------|
|                                            | 1     | 2 | 3 | 4 | 5 | 6 | 7 | 8 | 9 | 10 | 11 | 12 |       |
| Hulejová et al. (2012) <sup>76</sup>       | NRCT  | 1 | 0 | 0 | 0 | 0 | 1 | 0 | 0 | 1  | 0  | 0  | 1     |
| Joisten et al. (2021) <sup>27</sup>        | RCT   | 1 | 1 | 0 | 1 | 0 | 0 | 0 | 2 | 1  | 0  | 0  | 1     |
| Joo et al. (2022) <sup>46</sup>            | NRCT  | 1 | 0 | 0 | 1 | 0 | 2 | 0 | 2 | 1  | 0  | 1  | 0     |
| Kierkegaard et al. (2016) <sup>28</sup>    | NRCT  | 1 | 0 | 0 | 0 | 0 | 3 | 0 | 0 | 1  | 0  | 0  | 1     |
| Kisacik et al. (2016) <sup>77</sup>        | NRCT  | 1 | 0 | 0 | 0 | 0 | 0 | 1 | 0 | 1  | 0  | 0  | 0     |
| Kjølhede et al. (2016) <sup>29</sup>       | RCT   | 1 | 1 | 1 | 1 | 0 | 3 | 0 | 2 | 1  | 0  | 0  | 1     |
| Klare et al. (2015) <sup>89</sup>          | RCT   | 1 | 1 | 0 | 1 | 0 | 2 | 0 | 2 | 1  | 0  | 0  | 1     |
| Lamers et al. (2021) <sup>90</sup>         | NRCT  | 1 | 0 | 0 | 0 | 0 | 1 | 0 | 2 | 1  | 0  | 0  | 1     |
| Law et al. (2015) <sup>47</sup>            | NRCT  | 1 | 0 | 0 | 0 | 0 | 1 | 0 | 2 | 1  | 0  | 1  | 1     |
| Legeret et al. (2019) <sup>91</sup>        | NRCT  | 1 | 0 | 0 | 0 | 0 | 1 | 0 | 2 | 1  | 0  | 0  | 1     |
| Levitova et al. (2016) <sup>78</sup>       | NRCT  | 1 | 0 | 0 | 0 | 0 | 1 | 0 | 2 | 1  | 0  | 0  | 1     |
| Li et al. (2020) <sup>94</sup>             | RCT   | 1 | 1 | 0 | 1 | 0 | 1 | 0 | 2 | 1  | 0  | 1  | 1     |
| Lozada-Mellado et al. (2022) <sup>48</sup> | RCT   | 1 | 1 | 0 | 1 | 1 | 2 | 0 | 2 | 1  | 0  | 1  | 1     |
| Ma et al. (2020) <sup>79</sup>             | RCT   | 1 | 0 | 0 | 1 | 0 | 1 | 0 | 2 | 1  | 0  | 0  | 0     |
| Mähler et al. (2018) <sup>30</sup>         | RCT   | 1 | 0 | 0 | 1 | 0 | 1 | 0 | 2 | 1  | 0  | 1  | 1     |
| Majdinasab et al. (2018) <sup>31</sup>     | NRCT  | 1 | 0 | 0 | 0 | 0 | 1 | 0 | 2 | 1  | 0  | 0  | 1     |
| Minnock et al. (2020) <sup>56</sup>        | RCT   | 1 | 0 | 0 | 0 | 0 | 1 | 0 | 2 | 1  | 1  | 0  | 0     |
| Minnock et al. (2022) <sup>57</sup>        | NRCT  | 1 | 0 | 0 | 0 | 0 | 1 | 0 | 2 | 1  | 0  | 0  | 1     |
| Mokhtarzade et al. (2017) <sup>32</sup>    | RCT   | 1 | 0 | 0 | 1 | 0 | 1 | 0 | 2 | 1  | 0  | 1  | 1     |

| Study (n = 87)                                  | Score |   |   |   |   |   |   |   |   |    |    |    | Total |
|-------------------------------------------------|-------|---|---|---|---|---|---|---|---|----|----|----|-------|
|                                                 | 1     | 2 | 3 | 4 | 5 | 6 | 7 | 8 | 9 | 10 | 11 | 12 |       |
| Mokhtarzade et al. (2021) <sup>33</sup>         | RCT   | 1 | 0 | 1 | 1 | 0 | 2 | 1 | 2 | 1  | 0  | 1  | 1     |
| Nazari et al. (2023) <sup>58</sup>              | RCT   | 1 | 1 | 0 | 1 | 0 | 2 | 0 | 2 | 1  | 0  | 0  | 1     |
| Nieste et al. (2022) <sup>34</sup>              | RCT   | 1 | 1 | 1 | 1 | 0 | 1 | 0 | 2 | 1  | 1  | 1  | 1     |
| Nolte et al. (2021) <sup>80</sup>               | RCT   | 1 | 1 | 0 | 1 | 0 | 0 | 0 | 2 | 1  | 0  | 1  | 1     |
| Oliveira et al. (2017) <sup>95</sup>            | NRCT  | 1 | 0 | 0 | 0 | 0 | 2 | 0 | 2 | 1  | 0  | 1  | 1     |
| Ozkul et al. (2018) <sup>35</sup>               | RCT   | 1 | 1 | 0 | 1 | 1 | 2 | 0 | 2 | 1  | 0  | 1  | 1     |
| Perandini et al. (2014) <sup>69</sup>           | NRCT  | 1 | 0 | 0 | 0 | 0 | 1 | 0 | 2 | 1  | 0  | 1  | 1     |
| Perandini et al. (2015) <sup>70</sup>           | NRCT  | 1 | 0 | 0 | 0 | 0 | 1 | 0 | 2 | 1  | 0  | 0  | 1     |
| Perandini et al. (2016) <sup>71</sup>           | NRCT  | 1 | 0 | 0 | 0 | 0 | 1 | 0 | 2 | 1  | 0  | 0  | 1     |
| Pereira Nunes Pinto et al. (2017) <sup>49</sup> | NRCT  | 1 | 0 | 0 | 0 | 0 | 1 | 0 | 2 | 1  | 0  | 0  | 1     |
| Pool et al. (2004) <sup>100</sup>               | NRCT  | 1 | 0 | 0 | 0 | 0 | 1 | 0 | 2 | 1  | 0  | 0  | 1     |
| Rochette et al. (2018) <sup>96</sup>            | NRCT  | 1 | 0 | 0 | 0 | 0 | 1 | 0 | 0 | 1  | 0  | 0  | 1     |
| Rochette et.al (2018) <sup>97</sup>             | NRCT  | 1 | 0 | 0 | 0 | 0 | 1 | 0 | 0 | 1  | 0  | 0  | 1     |
| Rosa et al. (2008) <sup>59</sup>                | NRCT  | 1 | 0 | 0 | 0 | 0 | 0 | 0 | 2 | 1  | 0  | 0  | 1     |
| Rosa et al. (2010) <sup>60</sup>                | NRCT  | 1 | 0 | 0 | 0 | 0 | 0 | 0 | 0 | 1  | 0  | 0  | 1     |
| Rosa et al. (2011) <sup>61</sup>                | NRCT  | 1 | 0 | 0 | 0 | 0 | 1 | 0 | 2 | 1  | 1  | 0  | 1     |
| Rosa et al. (2011) <sup>62</sup>                | NRCT  | 1 | 0 | 0 | 0 | 0 | 1 | 0 | 2 | 1  | 1  | 0  | 1     |
| Salman et al. (2008) <sup>63</sup>              | NRCT  | 1 | 0 | 0 | 0 | 0 | 1 | 0 | 2 | 1  | 0  | 0  | 1     |
| Sandstad et al. (2015) <sup>101</sup>           | RCT   | 1 | 0 | 0 | 1 | 0 | 1 | 0 | 2 | 1  | 0  | 1  | 1     |
| Sarajlic et al. (2018) <sup>50</sup>            | NRCT  | 1 | 0 | 0 | 1 | 0 | 1 | 0 | 0 | 1  | 1  | 0  | 1     |

| Study (n = 87)                                      | Score |   |   |   |   |   |   |   |   |    |    |    | Total |
|-----------------------------------------------------|-------|---|---|---|---|---|---|---|---|----|----|----|-------|
|                                                     | 1     | 2 | 3 | 4 | 5 | 6 | 7 | 8 | 9 | 10 | 11 | 12 |       |
| Scheffers et al. (2023) <sup>92</sup>               | RCT   | 1 | 0 | 0 | 0 | 0 | 3 | 0 | 2 | 1  | 1  | 1  | 1     |
| Schulz et al. (2004) <sup>36</sup>                  | RCT   | 1 | 0 | 0 | 1 | 0 | 1 | 0 | 2 | 1  | 0  | 1  | 1     |
| Soriano-Maldonado et al. (2018) <sup>72</sup>       | NRCT  | 1 | 0 | 0 | 1 | 0 | 3 | 1 | 2 | 1  | 0  | 1  | 1     |
| Stavropoulos-Kalinoglou et al. (2013) <sup>51</sup> | NRCT  | 1 | 0 | 0 | 1 | 0 | 3 | 0 | 2 | 1  | 0  | 1  | 1     |
| Sveaas et al. (2020) <sup>81</sup>                  | RCT   | 1 | 1 | 1 | 1 | 1 | 3 | 0 | 2 | 1  | 1  | 0  | 0     |
| Švec et al. (2022) <sup>86</sup>                    | NRCT  | 1 | 0 | 0 | 0 | 0 | 1 | 0 | 2 | 1  | 0  | 0  | 1     |
| Tadayon Zadeh et al. (2020) <sup>37</sup>           | RCT   | 1 | 0 | 0 | 1 | 0 | 2 | 0 | 2 | 1  | 0  | 1  | 1     |
| Taspinar et al. (2015) <sup>102</sup>               | RCT   | 1 | 1 | 0 | 1 | 0 | 1 | 0 | 2 | 1  | 1  | 0  | 0     |
| Timóteo et al. (2018) <sup>73</sup>                 | NRCT  | 1 | 0 | 0 | 0 | 0 | 1 | 0 | 2 | 1  | 0  | 0  | 1     |
| Timóteo et al. (2019) <sup>98</sup>                 | NRCT  | 1 | 0 | 0 | 1 | 0 | 1 | 0 | 2 | 1  | 0  | 0  | 1     |
| Turner et al. (2014) <sup>64</sup>                  | NRCT  | 1 | 1 | 0 | 0 | 0 | 1 | 0 | 0 | 1  | 0  | 0  | 1     |
| Wadley et al. (2014) <sup>52</sup>                  | RCT   | 1 | 0 | 0 | 1 | 0 | 1 | 0 | 2 | 1  | 0  | 1  | 1     |
| White et al. (2006) <sup>38</sup>                   | NRCT  | 1 | 0 | 0 | 0 | 0 | 1 | 0 | 0 | 1  | 0  | 1  | 1     |
| Żebrowska et al. (2018) <sup>65</sup>               | NRCT  | 1 | 0 | 0 | 0 | 0 | 1 | 0 | 2 | 1  | 0  | 0  | 1     |

Abbreviations: RCT = randomized controlled trial; NRCT = non-randomized controlled trial.

**Supplementary Table 4. PRISMA 2020 Checklist**

| Section and Topic    | Item # | Checklist item                                                                                                                                                                                                                                                                   | Location where item is reported |
|----------------------|--------|----------------------------------------------------------------------------------------------------------------------------------------------------------------------------------------------------------------------------------------------------------------------------------|---------------------------------|
| <b>TITLE</b>         |        |                                                                                                                                                                                                                                                                                  |                                 |
| Title                | 1      | Identify the report as a systematic review.                                                                                                                                                                                                                                      | Page 1                          |
| <b>ABSTRACT</b>      |        |                                                                                                                                                                                                                                                                                  |                                 |
| Abstract             | 2      | See the PRISMA 2020 for Abstracts checklist.                                                                                                                                                                                                                                     | Page 1-2                        |
| <b>INTRODUCTION</b>  |        |                                                                                                                                                                                                                                                                                  |                                 |
| Rationale            | 3      | Describe the rationale for the review in the context of existing knowledge.                                                                                                                                                                                                      | Page 2-3                        |
| Objectives           | 4      | Provide an explicit statement of the objective(s) or question(s) the review addresses.                                                                                                                                                                                           | Page 2                          |
| <b>METHODS</b>       |        |                                                                                                                                                                                                                                                                                  |                                 |
| Eligibility criteria | 5      | Specify the inclusion and exclusion criteria for the review and how studies were grouped for the syntheses.                                                                                                                                                                      | Page 3-4<br>Table 1             |
| Information sources  | 6      | Specify all databases, registers, websites, organisations, reference lists and other sources searched or consulted to identify studies. Specify the date when each source was last searched or consulted.                                                                        | Page 3                          |
| Search strategy      | 7      | Present the full search strategies for all databases, registers and websites, including any filters and limits used.                                                                                                                                                             | Suppl Table 1                   |
| Selection process    | 8      | Specify the methods used to decide whether a study met the inclusion criteria of the review, including how many reviewers screened each record and each report retrieved, whether they worked independently, and if applicable, details of automation tools used in the process. | Page 4                          |
| Data collection      | 9      | Specify the methods used to collect data from reports, including how many reviewers collected data from each report, whether                                                                                                                                                     | Page 4                          |

|                               |     |                                                                                                                                                                                                                                                                               |        |
|-------------------------------|-----|-------------------------------------------------------------------------------------------------------------------------------------------------------------------------------------------------------------------------------------------------------------------------------|--------|
| process                       |     | they worked independently, any processes for obtaining or confirming data from study investigators, and if applicable, details of automation tools used in the process.                                                                                                       |        |
| Data items                    | 10a | List and define all outcomes for which data were sought. Specify whether all results that were compatible with each outcome domain in each study were sought (e.g. for all measures, time points, analyses), and if not, the methods used to decide which results to collect. | Page 4 |
|                               | 10b | List and define all other variables for which data were sought (e.g. participant and intervention characteristics, funding sources). Describe any assumptions made about any missing or unclear information.                                                                  | Page 4 |
| Study risk of bias assessment | 11  | Specify the methods used to assess risk of bias in the included studies, including details of the tool(s) used, how many reviewers assessed each study and whether they worked independently, and if applicable, details of automation tools used in the process.             | Page 5 |
| Effect measures               | 12  | Specify for each outcome the effect measure(s) (e.g. risk ratio, mean difference) used in the synthesis or presentation of results.                                                                                                                                           | N/A    |
| Synthesis methods             | 13a | Describe the processes used to decide which studies were eligible for each synthesis (e.g. tabulating the study intervention characteristics and comparing against the planned groups for each synthesis (item #5)).                                                          | Page 4 |
|                               | 13b | Describe any methods required to prepare the data for presentation or synthesis, such as handling of missing summary statistics, or data conversions.                                                                                                                         | N/A    |
|                               | 13c | Describe any methods used to tabulate or visually display results of individual studies and syntheses.                                                                                                                                                                        | Page 4 |
|                               | 13d | Describe any methods used to synthesize results and provide a rationale for the choice(s). If meta-analysis was performed, describe the model(s), method(s) to identify the presence and extent of statistical heterogeneity, and software package(s) used.                   | Page 4 |
|                               | 13e | Describe any methods used to explore possible causes of heterogeneity among study results (e.g. subgroup analysis, meta-regression).                                                                                                                                          | N/A    |
|                               | 13f | Describe any sensitivity analyses conducted to assess robustness of the synthesized results.                                                                                                                                                                                  | N/A    |
| Reporting bias                | 14  | Describe any methods used to assess risk of bias due to missing results in a synthesis (arising from reporting biases).                                                                                                                                                       | Page 5 |



|                               |     |                                                                                                                                                                                                                                                                                      |                                  |
|-------------------------------|-----|--------------------------------------------------------------------------------------------------------------------------------------------------------------------------------------------------------------------------------------------------------------------------------------|----------------------------------|
| assessment                    |     |                                                                                                                                                                                                                                                                                      |                                  |
| Certainty assessment          | 15  | Describe any methods used to assess certainty (or confidence) in the body of evidence for an outcome.                                                                                                                                                                                | Page 5                           |
| <b>RESULTS</b>                |     |                                                                                                                                                                                                                                                                                      |                                  |
| Study selection               | 16a | Describe the results of the search and selection process, from the number of records identified in the search to the number of studies included in the review, ideally using a flow diagram.                                                                                         | Page 5<br>Figure 1               |
|                               | 16b | Cite studies that might appear to meet the inclusion criteria, but which were excluded, and explain why they were excluded.                                                                                                                                                          | Figure 1                         |
| Study characteristics         | 17  | Cite each included study and present its characteristics.                                                                                                                                                                                                                            | Page 11-18<br>Table 1            |
| Risk of bias in studies       | 18  | Present assessments of risk of bias for each included study.                                                                                                                                                                                                                         | Suppl Table 3,<br>Suppl Figure 2 |
| Results of individual studies | 19  | For all outcomes, present, for each study: (a) summary statistics for each group (where appropriate) and (b) an effect estimate and its precision (e.g. confidence/credible interval), ideally using structured tables or plots.                                                     | Table 1                          |
| Results of syntheses          | 20a | For each synthesis, briefly summarise the characteristics and risk of bias among contributing studies.                                                                                                                                                                               | Page 6-9                         |
|                               | 20b | Present results of all statistical syntheses conducted. If meta-analysis was done, present for each the summary estimate and its precision (e.g. confidence/credible interval) and measures of statistical heterogeneity. If comparing groups, describe the direction of the effect. | Table 1                          |
|                               | 20c | Present results of all investigations of possible causes of heterogeneity among study results.                                                                                                                                                                                       | N/A                              |
|                               | 20d | Present results of all sensitivity analyses conducted to assess the robustness of the synthesized results.                                                                                                                                                                           | N/A                              |
| Reporting biases              | 21  | Present assessments of risk of bias due to missing results (arising from reporting biases) for each synthesis assessed.                                                                                                                                                              | Suppl Figure 1                   |

|                                                |     |                                                                                                                                                                                                                                            |          |
|------------------------------------------------|-----|--------------------------------------------------------------------------------------------------------------------------------------------------------------------------------------------------------------------------------------------|----------|
| Certainty of evidence                          | 22  | Present assessments of certainty (or confidence) in the body of evidence for each outcome assessed.                                                                                                                                        | Page 8-9 |
| <b>DISCUSSION</b>                              |     |                                                                                                                                                                                                                                            |          |
| Discussion                                     | 23a | Provide a general interpretation of the results in the context of other evidence.                                                                                                                                                          | Page 9   |
|                                                | 23b | Discuss any limitations of the evidence included in the review.                                                                                                                                                                            | Page 10  |
|                                                | 23c | Discuss any limitations of the review processes used.                                                                                                                                                                                      | Page 10  |
|                                                | 23d | Discuss implications of the results for practice, policy, and future research.                                                                                                                                                             | Page 10  |
| <b>OTHER INFORMATION</b>                       |     |                                                                                                                                                                                                                                            |          |
| Registration and protocol                      | 24a | Provide registration information for the review, including register name and registration number, or state that the review was not registered.                                                                                             | Page 1   |
|                                                | 24b | Indicate where the review protocol can be accessed, or state that a protocol was not prepared.                                                                                                                                             | N/A      |
|                                                | 24c | Describe and explain any amendments to information provided at registration or in the protocol.                                                                                                                                            | N/A      |
| Support                                        | 25  | Describe sources of financial or non-financial support for the review, and the role of the funders or sponsors in the review.                                                                                                              | Page 11  |
| Competing interests                            | 26  | Declare any competing interests of review authors.                                                                                                                                                                                         | Page 11  |
| Availability of data, code and other materials | 27  | Report which of the following are publicly available and where they can be found: template data collection forms; data extracted from included studies; data used for all analyses; analytic code; any other materials used in the review. | Page 11  |

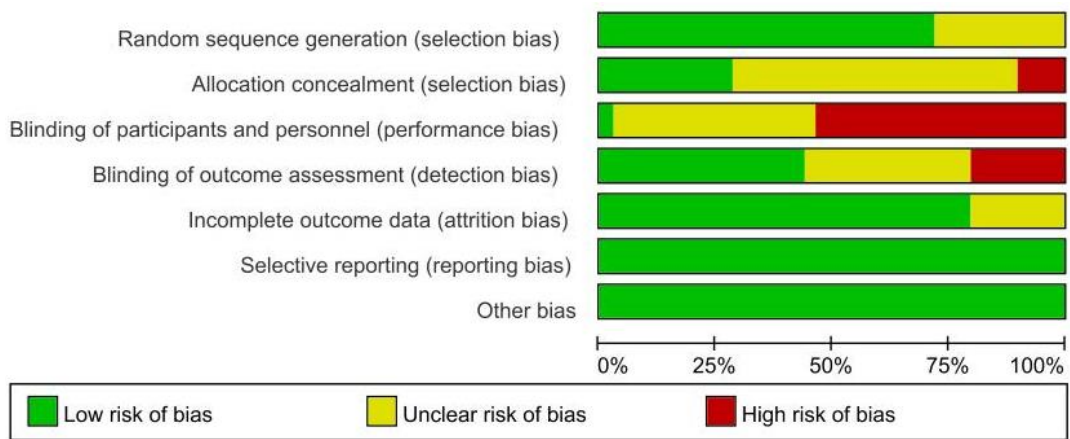

**Supplementary Fig. 1.** The overall risk of bias for included RCTs

|                                   | Random sequence generation (selection bias) | Allocation concealment (selection bias) | Blinding of participants and personnel (performance bias) | Blinding of outcome assessment (detection bias) | Incomplete outcome data (attrition bias) | Selective reporting (reporting bias) | Other bias |
|-----------------------------------|---------------------------------------------|-----------------------------------------|-----------------------------------------------------------|-------------------------------------------------|------------------------------------------|--------------------------------------|------------|
| Alexanderson 2014 <sup>83</sup>   | +                                           | +                                       | +                                                         | +                                               | +                                        | +                                    | +          |
| Andersson 2020 <sup>60</sup>      | +                                           | +                                       | ?                                                         | +                                               | ?                                        | +                                    | +          |
| Astley 2021 <sup>93</sup>         | +                                           | ?                                       | +                                                         | +                                               | +                                        | +                                    | +          |
| Aydin 2016 <sup>74</sup>          | +                                           | ?                                       | ?                                                         | ?                                               | +                                        | +                                    | +          |
| Azeez 2020 <sup>41</sup>          | +                                           | ?                                       | ?                                                         | ?                                               | +                                        | +                                    | +          |
| Bahmani 2022 <sup>17</sup>        | +                                           | ?                                       | ?                                                         | ?                                               | ?                                        | +                                    | +          |
| Bansi 2012 <sup>18</sup>          | ?                                           | ?                                       | ?                                                         | +                                               | +                                        | +                                    | +          |
| Briken 2016 <sup>21</sup>         | +                                           | +                                       | ?                                                         | +                                               | +                                        | +                                    | +          |
| Coudert 2022 <sup>85</sup>        | +                                           | +                                       | ?                                                         | +                                               | ?                                        | +                                    | +          |
| Cronin 2019 <sup>88</sup>         | +                                           | +                                       | +                                                         | +                                               | +                                        | +                                    | +          |
| Deckx 2017 <sup>75</sup>          | ?                                           | ?                                       | +                                                         | +                                               | +                                        | +                                    | +          |
| de Souza 2016 <sup>23</sup>       | +                                           | +                                       | +                                                         | +                                               | +                                        | +                                    | +          |
| Faramarzi 2020 <sup>28</sup>      | ?                                           | +                                       | +                                                         | +                                               | +                                        | +                                    | +          |
| Farinha 2018 <sup>53</sup>        | +                                           | ?                                       | ?                                                         | +                                               | +                                        | +                                    | +          |
| Gautam 2019 <sup>44</sup>         | +                                           | ?                                       | +                                                         | +                                               | +                                        | +                                    | +          |
| Gautam 2020 <sup>45</sup>         | +                                           | ?                                       | +                                                         | +                                               | +                                        | +                                    | +          |
| Golzari 2010 <sup>26</sup>        | ?                                           | ?                                       | ?                                                         | ?                                               | +                                        | +                                    | +          |
| Hashemi 2022 <sup>68</sup>        | ?                                           | ?                                       | ?                                                         | ?                                               | ?                                        | +                                    | +          |
| Joisten 2021 <sup>27</sup>        | +                                           | ?                                       | ?                                                         | ?                                               | ?                                        | +                                    | +          |
| Kjelhede 2016 <sup>29</sup>       | +                                           | +                                       | +                                                         | ?                                               | +                                        | +                                    | +          |
| Klare 2015 <sup>89</sup>          | +                                           | ?                                       | +                                                         | ?                                               | +                                        | +                                    | +          |
| Li 2020 <sup>94</sup>             | +                                           | ?                                       | ?                                                         | +                                               | +                                        | +                                    | +          |
| Lozada-Mellado 2022 <sup>48</sup> | +                                           | +                                       | ?                                                         | +                                               | +                                        | +                                    | +          |
| Ma 2020 <sup>78</sup>             | +                                           | ?                                       | ?                                                         | ?                                               | ?                                        | +                                    | +          |
| Mähler 2018 <sup>30</sup>         | +                                           | ?                                       | +                                                         | +                                               | +                                        | +                                    | +          |
| Minnock 2020 <sup>56</sup>        | ?                                           | +                                       | ?                                                         | ?                                               | ?                                        | +                                    | +          |
| Mokhtarzade 2017 <sup>33</sup>    | ?                                           | ?                                       | ?                                                         | ?                                               | +                                        | +                                    | +          |
| Mokhtarzade 2021 <sup>32</sup>    | +                                           | +                                       | +                                                         | +                                               | +                                        | +                                    | +          |
| Nazari 2023 <sup>58</sup>         | +                                           | +                                       | +                                                         | +                                               | +                                        | +                                    | +          |
| Nieste 2022 <sup>34</sup>         | +                                           | +                                       | +                                                         | +                                               | +                                        | +                                    | +          |
| Nolte 2021 <sup>80</sup>          | +                                           | ?                                       | +                                                         | +                                               | +                                        | +                                    | +          |
| Ozkul 2018 <sup>35</sup>          | +                                           | ?                                       | +                                                         | +                                               | +                                        | +                                    | +          |
| Sandstad 2015 <sup>101</sup>      | ?                                           | ?                                       | ?                                                         | ?                                               | +                                        | +                                    | +          |
| Scheffers 2023 <sup>92</sup>      | +                                           | +                                       | +                                                         | +                                               | +                                        | +                                    | +          |
| Schulz 2004 <sup>36</sup>         | ?                                           | ?                                       | ?                                                         | ?                                               | ?                                        | +                                    | +          |
| Sveaas 2020 <sup>81</sup>         | +                                           | +                                       | +                                                         | +                                               | +                                        | +                                    | +          |
| Tadayon Zadeh 2020 <sup>37</sup>  | ?                                           | ?                                       | ?                                                         | ?                                               | +                                        | +                                    | +          |
| Taspinar 2015 <sup>102</sup>      | +                                           | ?                                       | +                                                         | +                                               | +                                        | +                                    | +          |
| Wadley 2014 <sup>52</sup>         | ?                                           | ?                                       | ?                                                         | ?                                               | +                                        | +                                    | +          |

Supplementary Fig. 2. The risk of bias for each included RCTs
